# Supplementary material for: Genetic diversity and population structure of the Bacillus cereus group bacteria from diverse marine environments
Source: PubMed Central journal article supplement (PMC5429728; doi:10.1038/s41598-017-00817-1), 2017-04-06
Supplement: 41598_2017_817_MOESM1_ESM.pdf [file 41598_2017_817_MOESM1_ESM.pdf]

**Genetic diversity and population structure of the *Bacillus cereus* group bacteria from diverse marine environments**

Yang Liu<sup>1</sup>, Qiliang Lai<sup>1</sup>, Juan Du<sup>1</sup>, Zongze Shao<sup>1,\*</sup>

<sup>1</sup>State Key Laboratory Breeding Base of Marine Genetic Resources; Key Laboratory of Marine Genetic Resources, Third Institute of Oceanography, SOA; Collaborative Innovation Center for Exploitation and Utilization of Marine Biological Resources; Key Laboratory of Marine Genetic Resources of Fujian Province, Xiamen 361005, China

\*Corresponding author: Zongze Shao, E-mail: shaozz@163.com.

## Supplementary Data

**Table S1 Allele profiles and sequence types of 82 strains used in this study**

| NO.  | <i>glp</i> | <i>gmk</i> | <i>ilvD</i> | <i>pta</i> | <i>purH</i> | <i>pycA</i> | <i>tpi</i> | STs |
|------|------------|------------|-------------|------------|-------------|-------------|------------|-----|
| BC01 | 19         | 2          | 59          | 65         | 19          | 3           | 55         | 761 |
| BC02 | 19         | 2          | 59          | 65         | 19          | 3           | 55         | 761 |
| BC03 | 19         | 2          | 59          | 65         | 19          | 3           | 55         | 761 |
| BC04 | 19         | 2          | 59          | 65         | 19          | 3           | 55         | 761 |
| BC05 | 19         | 2          | 59          | 65         | 19          | 3           | 55         | 761 |
| BC06 | 19         | 2          | 59          | 65         | 19          | 3           | 55         | 761 |
| BC07 | 19         | 2          | 59          | 65         | 19          | 3           | 55         | 761 |
| BC08 | 19         | 2          | 59          | 65         | 19          | 3           | 55         | 761 |
| BC09 | 13         | 47         | 9           | 11         | 68          | 12          | 10         | 177 |
| BC10 | 178        | 27         | 209         | 184        | 131         | 169         | 100        | 764 |
| BC11 | 13         | 47         | 9           | 11         | 68          | 12          | 10         | 177 |
| BC12 | 15         | 6          | 29          | 8          | 4           | 7           | 14         | 191 |
| BC13 | 194        | 115        | 222         | 200        | 190         | 170         | 155        | 765 |
| BC14 | 19         | 2          | 59          | 65         | 19          | 3           | 55         | 761 |
| BC15 | 19         | 2          | 59          | 65         | 19          | 3           | 55         | 761 |
| BC16 | 13         | 47         | 9           | 11         | 68          | 12          | 10         | 177 |
| BC17 | 19         | 2          | 59          | 65         | 19          | 3           | 55         | 761 |
| BC18 | 19         | 2          | 59          | 65         | 19          | 3           | 55         | 761 |
| BC19 | 19         | 2          | 59          | 65         | 19          | 3           | 55         | 761 |
| BC20 | 13         | 8          | 9           | 201        | 9           | 12          | 23         | 766 |
| BC21 | 19         | 2          | 59          | 65         | 19          | 3           | 55         | 761 |
| BC22 | 19         | 2          | 59          | 65         | 19          | 3           | 55         | 761 |
| BC23 | 13         | 47         | 9           | 11         | 68          | 12          | 10         | 177 |
| BC24 | 102        | 35         | 107         | 22         | 96          | 20          | 156        | 767 |
| BC25 | 202        | 116        | 223         | 202        | 118         | 171         | 128        | 769 |
| BC26 | 15         | 6          | 29          | 46         | 4           | 8           | 21         | 760 |
| BC27 | 196        | 2          | 224         | 203        | 19          | 3           | 38         | 770 |
| BC28 | 13         | 47         | 9           | 11         | 68          | 12          | 10         | 177 |
| BC29 | 33         | 8          | 13          | 19         | 2           | 17          | 17         | 34  |
| BC30 | 197        | 117        | 225         | 204        | 191         | 172         | 100        | 771 |
| BC31 | 3          | 23         | 132         | 152        | 38          | 37          | 157        | 772 |
| BC32 | 24         | 12         | 33          | 205        | 44          | 31          | 158        | 773 |
| BC33 | 12         | 8          | 43          | 28         | 9           | 12          | 23         | 758 |
| BC34 | 198        | 22         | 33          | 37         | 192         | 38          | 5          | 774 |
| BC35 | 199        | 31         | 231         | 206        | 45          | 53          | 159        | 775 |
| BC36 | 56         | 1          | 93          | 1          | 193         | 37          | 160        | 778 |
| BC37 | 41         | 6          | 23          | 9          | 4           | 173         | 21         | 779 |
| BC38 | 13         | 47         | 9           | 11         | 68          | 12          | 10         | 177 |
| BC39 | 200        | 118        | 226         | 207        | 194         | 174         | 162        | 780 |

|      |     |     |     |     |     |     |     |     |
|------|-----|-----|-----|-----|-----|-----|-----|-----|
| BC40 | 203 | 115 | 227 | 208 | 195 | 175 | 163 | 781 |
| BC41 | 72  | 42  | 69  | 42  | 88  | 41  | 30  | 762 |
| BC42 | 16  | 119 | 170 | 9   | 4   | 7   | 21  | 782 |
| BC43 | 126 | 120 | 228 | 209 | 4   | 114 | 37  | 783 |
| BC44 | 201 | 36  | 229 | 210 | 196 | 176 | 32  | 784 |
| BC45 | 5   | 4   | 3   | 4   | 15  | 6   | 16  | 32  |
| BC46 | 13  | 47  | 9   | 11  | 68  | 12  | 10  | 177 |
| BC47 | 13  | 47  | 9   | 11  | 68  | 12  | 10  | 177 |
| BC48 | 13  | 47  | 9   | 11  | 68  | 12  | 10  | 177 |
| BC49 | 5   | 4   | 3   | 4   | 15  | 6   | 16  | 32  |
| BC50 | 5   | 4   | 3   | 4   | 15  | 6   | 16  | 32  |
| BC51 | 5   | 4   | 3   | 4   | 15  | 6   | 16  | 32  |
| BC52 | 5   | 4   | 3   | 4   | 15  | 6   | 16  | 32  |
| BC53 | 5   | 4   | 3   | 4   | 15  | 6   | 16  | 32  |
| BC54 | 5   | 4   | 3   | 4   | 15  | 6   | 16  | 32  |
| BC55 | 5   | 4   | 3   | 4   | 15  | 6   | 16  | 32  |
| BC56 | 19  | 2   | 59  | 65  | 19  | 3   | 55  | 761 |
| BC57 | 19  | 2   | 59  | 65  | 19  | 3   | 55  | 761 |
| BC58 | 19  | 2   | 59  | 65  | 19  | 3   | 55  | 761 |
| BC59 | 194 | 115 | 222 | 200 | 190 | 170 | 155 | 765 |
| BC60 | 194 | 115 | 222 | 200 | 190 | 170 | 155 | 765 |
| BC61 | 194 | 115 | 222 | 200 | 190 | 170 | 155 | 765 |
| BC62 | 194 | 115 | 222 | 200 | 190 | 170 | 155 | 765 |
| BC63 | 5   | 4   | 3   | 4   | 15  | 6   | 16  | 32  |
| BC64 | 13  | 47  | 9   | 11  | 68  | 12  | 7   | 759 |
| BC65 | 5   | 4   | 3   | 4   | 15  | 6   | 16  | 32  |
| BC66 | 5   | 4   | 3   | 4   | 15  | 6   | 16  | 32  |
| BC67 | 5   | 4   | 3   | 4   | 15  | 6   | 16  | 32  |
| BC68 | 5   | 4   | 3   | 4   | 15  | 6   | 16  | 32  |
| BC69 | 5   | 4   | 3   | 4   | 15  | 6   | 16  | 32  |
| BC70 | 13  | 47  | 9   | 11  | 68  | 12  | 10  | 177 |
| BC71 | 13  | 47  | 9   | 11  | 68  | 12  | 10  | 177 |
| BC72 | 1   | 1   | 1   | 1   | 1   | 1   | 1   | 1   |
| BC73 | 13  | 125 | 8   | 11  | 11  | 12  | 169 | 921 |
| BC74 | 211 | 127 | 221 | 221 | 57  | 10  | 171 | 930 |
| BC75 | 25  | 10  | 22  | 53  | 57  | 23  | 44  | 116 |
| BC76 | 63  | 13  | 58  | 23  | 25  | 44  | 35  | 83  |
| BC77 | 15  | 6   | 10  | 8   | 3   | 7   | 14  | 10  |
| BC78 | 64  | 10  | 9   | 36  | 56  | 22  | 11  | 115 |
| BC79 | 43  | 26  | 35  | 42  | 39  | 41  | 30  | 111 |
| BC80 | 195 | 121 | 230 | 211 | 197 | 177 | 161 | 768 |
| BC81 | 205 | 123 | 107 | 213 | 199 | 10  | 165 | 907 |
| BC82 | 193 | 114 | 221 | 199 | 189 | 168 | 154 | 763 |

---

**Table S2 The accession numbers of the genome sequences for 32 strains of the *B. cereus* group**

| No.  | MCCC No./Names                                        | Accession numbers | Source               |
|------|-------------------------------------------------------|-------------------|----------------------|
| BC10 | MCCC 1A00359                                          | MACI00000000      | This study           |
| BC12 | MCCC 1A00361                                          | LZRC00000000      | This study           |
| BC13 | MCCC 1A00365                                          | MACH00000000      | This study           |
| BC15 | MCCC 1A00395                                          | MACE00000000      | This study           |
| BC20 | MCCC 1A00432                                          | LZQZ00000000      | This study           |
| BC24 | MCCC 1A00594                                          | MAOB00000000      | This study           |
| BC25 | MCCC 1A00732                                          | MAOC00000000      | This study           |
| BC26 | MCCC 1A00841                                          | LZRA00000000      | This study           |
| BC27 | MCCC 1A01056                                          | MAOH00000000      | This study           |
| BC29 | MCCC 1A01404                                          | LZRB00000000      | This study           |
| BC30 | MCCC 1A01406                                          | MACG00000000      | This study           |
| BC31 | MCCC 1A01412                                          | LZQW00000000      | This study           |
| BC32 | MCCC 1A01414                                          | MAOD00000000      | This study           |
| BC33 | MCCC 1A01874                                          | LZQY00000000      | This study           |
| BC34 | MCCC 1A02143                                          | MAOF00000000      | This study           |
| BC35 | MCCC 1A02146                                          | MAOE00000000      | This study           |
| BC36 | MCCC 1A02161                                          | LZQX00000000      | This study           |
| BC39 | MCCC 1A04098                                          | MAOI00000000      | This study           |
| BC40 | MCCC 1A05675                                          | MAOG00000000      | This study           |
| BC44 | MCCC 1A05942                                          | MACF00000000      | This study           |
| BC45 | MCCC 1A06182                                          | MACD00000000      | This study           |
| BC72 | <i>B. anthracis</i> ATCC 14578 <sup>T</sup>           | ABJC01000000      | This study           |
| BC73 | <i>B. cereus</i> ATCC 14579 <sup>T</sup>              | NC_004722.1       | The GenBank database |
| BC74 | <i>B. cytotoxicus</i> NVH 391-98 <sup>T</sup>         | NC_009674.1       | The GenBank database |
| BC75 | <i>B. mycoides</i> DSM 2048 <sup>T</sup>              | NZ_CM000742.1     | The GenBank database |
| BC76 | <i>B. pseudomycooides</i> DSM 12442 <sup>T</sup>      | NZ_CM000745.1     | The GenBank database |
| BC77 | <i>B. thuringiensis</i> ATCC 10792 <sup>T</sup>       | NZ_CM000753.1     | The GenBank database |
| BC78 | <i>B. weihenstephanensis</i> DSM 11821 <sup>T</sup>   | BAUY00000000.1    | The GenBank database |
| BC79 | <i>B. toyonensis</i> BCT-7112 <sup>T</sup>            | NC_022781.1       | The GenBank database |
| BC80 | “ <i>B. gaemokensis</i> ” BL3-6 <sup>T</sup>          | JOTM00000000      | The GenBank database |
| BC81 | “ <i>B. manliponensis</i> ” BL4-6 <sup>T</sup>        | JOTN00000000      | The GenBank database |
| BC82 | “ <i>B. bingmayongensis</i> ” FJAT-13831 <sup>T</sup> | AKCS01000000      | The GenBank database |



**Table S4 The primer pairs of seven housekeeping genes in *B. cereus* group MLST**

| Name   | Forward primer 5'→3' sequence | Annealing temperature ( °C) | Extension time (s) |
|--------|-------------------------------|-----------------------------|--------------------|
| glpF-F | GCGTTTGTGCTGGTGTAAGT          | 59                          | 30                 |
| glpF-R | CTGCAATCGGAAGGAAGAAG          |                             |                    |
| gmk-F  | ATTTAAGTGAGGAAGGGTAGG         | 56                          | 40                 |
| gmk-R  | GCAATGTTACCAACCACAA           |                             |                    |
| ilvD-F | CGGGGCAAACATTAAGAGAA          | 58                          | 30                 |
| ilvD-R | GGTTCTGGTCGTTTCCATTC          |                             |                    |
| pta-F  | GCAGAGCGTTTAGCAAAAAGAA        | 56                          | 30                 |
| pta-R  | TGCAATGCGAGTTGCTTCTA          |                             |                    |
| purH-F | CTGCTGCGAAAAATCACAAA          | 56                          | 30                 |
| purH-R | CTCACGATTCGCTGCAATAA          |                             |                    |
| pycA-F | GCGTTAGGTGGAAACGAAAG          | 57                          | 30                 |
| pycA-R | CGCGTCCAAGTTTATGGAAT          |                             |                    |
| tpi-F  | GCCCAGTAGCACTTAGCGAC          | 58                          | 30                 |
| tpi-R  | CCGAAACCGTCAAGAATGAT          |                             |                    |

The data of the primer pairs were from the P scheme for *B. cereus* group MLST.

The capital “F” and “R” in the name of primer pairs represented respectively a forward primer and a reverse primer.

**Table S5 The accession numbers of seven housekeeping genes for 71 strains used in this study.**

| NO.  | <i>glpF</i> | <i>gmk</i> | <i>ilvD</i> | <i>pta</i> | <i>purH</i> | <i>pycA</i> | <i>tpi</i> |
|------|-------------|------------|-------------|------------|-------------|-------------|------------|
| BC01 | KJ812761    | KJ812548   | KJ812477    | KJ812690   | KJ812903    | KJ812619    | KJ812832   |
| BC02 | KJ812762    | KJ812549   | KJ812478    | KJ812691   | KJ812904    | KJ812620    | KJ812833   |
| BC03 | KJ812763    | KJ812550   | KJ812479    | KJ812692   | KJ812905    | KJ812621    | KJ812834   |
| BC04 | KJ812764    | KJ812551   | KJ812480    | KJ812693   | KJ812906    | KJ812622    | KJ812835   |
| BC05 | KJ812765    | KJ812552   | KJ812481    | KJ812694   | KJ812907    | KJ812623    | KJ812836   |
| BC06 | KJ812766    | KJ812553   | KJ812482    | KJ812695   | KJ812908    | KJ812624    | KJ812837   |
| BC07 | KJ812767    | KJ812554   | KJ812483    | KJ812696   | KJ812909    | KJ812625    | KJ812838   |
| BC08 | KJ812768    | KJ812555   | KJ812484    | KJ812697   | KJ812910    | KJ812626    | KJ812839   |
| BC09 | KJ812769    | KJ812556   | KJ812485    | KJ812698   | KJ812911    | KJ812627    | KJ812840   |
| BC10 | KJ812770    | KJ812557   | KJ812486    | KJ812699   | KJ812912    | KJ812628    | KJ812841   |
| BC11 | KJ812771    | KJ812558   | KJ812487    | KJ812700   | KJ812913    | KJ812629    | KJ812842   |
| BC12 | KJ812772    | KJ812559   | KJ812488    | KJ812701   | KJ812914    | KJ812630    | KJ812843   |
| BC13 | KJ812773    | KJ812560   | KJ812489    | KJ812702   | KJ812915    | KJ812631    | KJ812844   |
| BC14 | KJ812774    | KJ812561   | KJ812490    | KJ812703   | KJ812916    | KJ812632    | KJ812845   |
| BC15 | KJ812775    | KJ812562   | KJ812491    | KJ812704   | KJ812917    | KJ812633    | KJ812846   |
| BC16 | KJ812776    | KJ812563   | KJ812492    | KJ812705   | KJ812918    | KJ812634    | KJ812847   |
| BC17 | KJ812777    | KJ812564   | KJ812493    | KJ812706   | KJ812919    | KJ812635    | KJ812848   |
| BC18 | KJ812778    | KJ812565   | KJ812494    | KJ812707   | KJ812920    | KJ812636    | KJ812849   |
| BC19 | KJ812779    | KJ812566   | KJ812495    | KJ812708   | KJ812921    | KJ812637    | KJ812850   |
| BC20 | KJ812780    | KJ812567   | KJ812496    | KJ812709   | KJ812922    | KJ812638    | KJ812851   |
| BC21 | KJ812781    | KJ812568   | KJ812497    | KJ812710   | KJ812923    | KJ812639    | KJ812852   |
| BC22 | KJ812782    | KJ812569   | KJ812498    | KJ812711   | KJ812924    | KJ812640    | KJ812853   |
| BC23 | KJ812783    | KJ812570   | KJ812499    | KJ812712   | KJ812925    | KJ812641    | KJ812854   |
| BC24 | KJ812784    | KJ812571   | KJ812500    | KJ812713   | KJ812926    | KJ812642    | KJ812855   |
| BC25 | KJ812785    | KJ812572   | KJ812501    | KJ812714   | KJ812927    | KJ812643    | KJ812856   |
| BC26 | KJ812786    | KJ812573   | KJ812502    | KJ812715   | KJ812928    | KJ812644    | KJ812857   |
| BC27 | KJ812787    | KJ812574   | KJ812503    | KJ812716   | KJ812929    | KJ812645    | KJ812858   |
| BC28 | KJ812788    | KJ812575   | KJ812504    | KJ812717   | KJ812930    | KJ812646    | KJ812859   |
| BC29 | KJ812789    | KJ812576   | KJ812505    | KJ812718   | KJ812931    | KJ812647    | KJ812860   |
| BC30 | KJ812790    | KJ812577   | KJ812506    | KJ812719   | KJ812932    | KJ812648    | KJ812861   |
| BC31 | KJ812791    | KJ812578   | KJ812507    | KJ812720   | KJ812933    | KJ812649    | KJ812862   |
| BC32 | KJ812792    | KJ812579   | KJ812508    | KJ812721   | KJ812934    | KJ812650    | KJ812863   |
| BC33 | KJ812793    | KJ812580   | KJ812509    | KJ812722   | KJ812935    | KJ812651    | KJ812864   |
| BC34 | KJ812794    | KJ812581   | KJ812510    | KJ812723   | KJ812936    | KJ812652    | KJ812865   |
| BC35 | KJ812795    | KJ812582   | KJ812511    | KJ812724   | KJ812937    | KJ812653    | KJ812866   |
| BC36 | KJ812796    | KJ812583   | KJ812512    | KJ812725   | KJ812938    | KJ812654    | KJ812867   |
| BC37 | KJ812797    | KJ812584   | KJ812513    | KJ812726   | KJ812939    | KJ812655    | KJ812868   |
| BC38 | KJ812798    | KJ812585   | KJ812514    | KJ812727   | KJ812940    | KJ812656    | KJ812869   |
| BC39 | KJ812799    | KJ812586   | KJ812515    | KJ812728   | KJ812941    | KJ812657    | KJ812870   |
| BC40 | KJ812800    | KJ812587   | KJ812516    | KJ812729   | KJ812942    | KJ812658    | KJ812871   |
| BC41 | KJ812801    | KJ812588   | KJ812517    | KJ812730   | KJ812943    | KJ812659    | KJ812872   |
| BC42 | KJ812802    | KJ812589   | KJ812518    | KJ812731   | KJ812944    | KJ812660    | KJ812873   |
| BC43 | KJ812803    | KJ812590   | KJ812519    | KJ812732   | KJ812945    | KJ812661    | KJ812874   |

|      |          |          |          |          |          |          |          |
|------|----------|----------|----------|----------|----------|----------|----------|
| BC44 | KJ812804 | KJ812591 | KJ812520 | KJ812733 | KJ812946 | KJ812662 | KJ812875 |
| BC45 | KJ812805 | KJ812592 | KJ812521 | KJ812734 | KJ812947 | KJ812663 | KJ812876 |
| BC46 | KJ812806 | KJ812593 | KJ812522 | KJ812735 | KJ812948 | KJ812664 | KJ812877 |
| BC47 | KJ812807 | KJ812594 | KJ812523 | KJ812736 | KJ812949 | KJ812665 | KJ812878 |
| BC48 | KJ812808 | KJ812595 | KJ812524 | KJ812737 | KJ812950 | KJ812666 | KJ812879 |
| BC49 | KJ812809 | KJ812596 | KJ812525 | KJ812738 | KJ812951 | KJ812667 | KJ812880 |
| BC50 | KJ812810 | KJ812597 | KJ812526 | KJ812739 | KJ812952 | KJ812668 | KJ812881 |
| BC51 | KJ812811 | KJ812598 | KJ812527 | KJ812740 | KJ812953 | KJ812669 | KJ812882 |
| BC52 | KJ812812 | KJ812599 | KJ812528 | KJ812741 | KJ812954 | KJ812670 | KJ812883 |
| BC53 | KJ812813 | KJ812600 | KJ812529 | KJ812742 | KJ812955 | KJ812671 | KJ812884 |
| BC54 | KJ812814 | KJ812601 | KJ812530 | KJ812743 | KJ812956 | KJ812672 | KJ812885 |
| BC55 | KJ812815 | KJ812602 | KJ812531 | KJ812744 | KJ812957 | KJ812673 | KJ812886 |
| BC56 | KJ812816 | KJ812603 | KJ812532 | KJ812745 | KJ812958 | KJ812674 | KJ812887 |
| BC57 | KJ812817 | KJ812604 | KJ812533 | KJ812746 | KJ812959 | KJ812675 | KJ812888 |
| BC58 | KJ812818 | KJ812605 | KJ812534 | KJ812747 | KJ812960 | KJ812676 | KJ812889 |
| BC59 | KJ812819 | KJ812606 | KJ812535 | KJ812748 | KJ812961 | KJ812677 | KJ812890 |
| BC60 | KJ812820 | KJ812607 | KJ812536 | KJ812749 | KJ812962 | KJ812678 | KJ812891 |
| BC61 | KJ812821 | KJ812608 | KJ812537 | KJ812750 | KJ812963 | KJ812679 | KJ812892 |
| BC62 | KJ812822 | KJ812609 | KJ812538 | KJ812751 | KJ812964 | KJ812680 | KJ812893 |
| BC63 | KJ812823 | KJ812610 | KJ812539 | KJ812752 | KJ812965 | KJ812681 | KJ812894 |
| BC64 | KJ812824 | KJ812611 | KJ812540 | KJ812753 | KJ812966 | KJ812682 | KJ812895 |
| BC65 | KJ812825 | KJ812612 | KJ812541 | KJ812754 | KJ812967 | KJ812683 | KJ812896 |
| BC66 | KJ812826 | KJ812613 | KJ812542 | KJ812755 | KJ812968 | KJ812684 | KJ812897 |
| BC67 | KJ812827 | KJ812614 | KJ812543 | KJ812756 | KJ812969 | KJ812685 | KJ812898 |
| BC68 | KJ812828 | KJ812615 | KJ812544 | KJ812757 | KJ812970 | KJ812686 | KJ812899 |
| BC69 | KJ812829 | KJ812616 | KJ812545 | KJ812758 | KJ812971 | KJ812687 | KJ812900 |
| BC70 | KJ812830 | KJ812617 | KJ812546 | KJ812759 | KJ812972 | KJ812688 | KJ812901 |
| BC71 | KJ812831 | KJ812618 | KJ812547 | KJ812760 | KJ812973 | KJ812689 | KJ812902 |

---



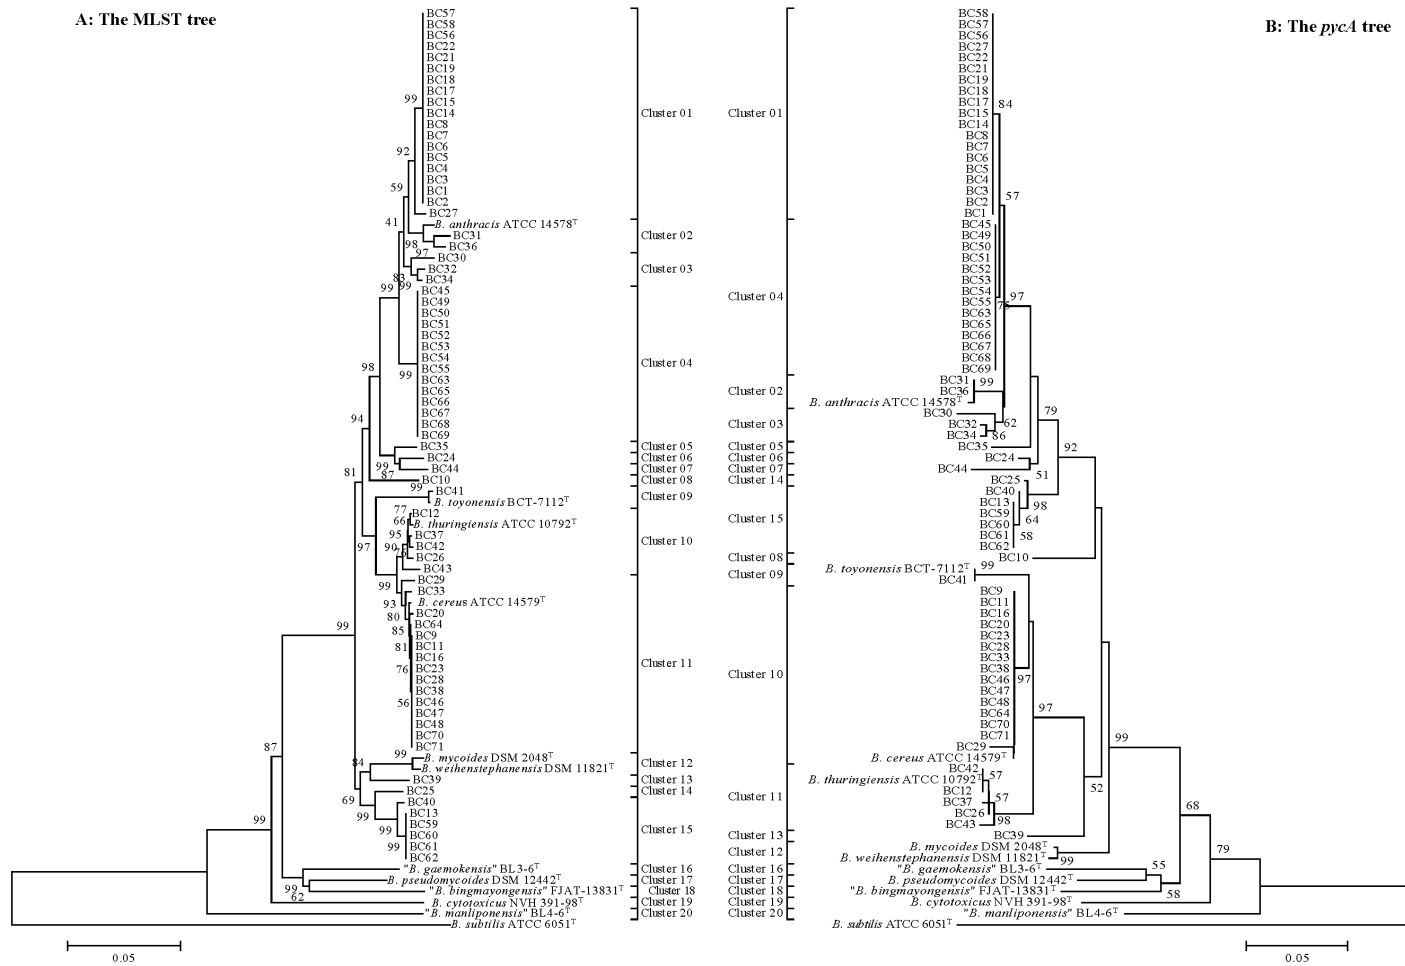

**Figure S1 The comparison of phylogenetic trees based on, respectively, seven concatenated housekeeping genes and *pycA* gene sequences**
